# Supplementary material
Source: PubMed Central journal article supplement (PMC3041856)
Supplement: NIHMS266463-supplement-1_si_001.pdf [file NIHMS266463-supplement-1_si_001.pdf]

# Supporting Information

*for*

## Acyloxy Nitroso Compounds as Nitroxyl (HNO)

Donors: Kinetics, Reactions with Thiols and

## Vasodilation Properties

*Mai E. Shoman<sup>1</sup>, Jenna F. DuMond<sup>1</sup>, T. S. Isbell<sup>2</sup>, J. H. Crawford<sup>2</sup>, Angela Brandon<sup>2</sup>, Jaideep Honovar<sup>2</sup>, Dario A. Vitturi<sup>2</sup>, C. R. White<sup>3</sup>, R. P. Patel,<sup>2</sup> and S. Bruce King<sup>1</sup> \**

<sup>1</sup>Department of Chemistry, Wake Forest University

<sup>2</sup>Department of Pathology and Center for Free Radical Biology, University of Alabama-  
Birmingham

<sup>3</sup>Department of Medicine and Center for Free Radical Biology, University of Alabama-  
Birmingham

\* Corresponding Author: S. Bruce King, Department of Chemistry, Wake Forest University, Winston-Salem, NC, USA 27109. Tel: 336 758 5774, Fax: 336 758 4656, e-mail: kingsb@wfu.edu

## Table of contents

|          |                                                                                               |            |
|----------|-----------------------------------------------------------------------------------------------|------------|
| <b>1</b> | <b><sup>1</sup>H NMR spectrum for 2.....</b>                                                  | <b>S3</b>  |
| <b>2</b> | <b><sup>13</sup>C NMR spectrum for 2 .....</b>                                                | <b>S4</b>  |
| <b>3</b> | <b>UV-Vis spectra for decomposition of 1 and 2 .....</b>                                      | <b>S5</b>  |
| <b>4</b> | <b>HNO release from 1 over time .....</b>                                                     | <b>S6</b>  |
| <b>5</b> | <b>Kinetic GC-MS for the decomposition of 1 at different conditions. ....</b>                 | <b>S7</b>  |
| <b>6</b> | <b>GC-MS of the reaction of 1 with thiols in presence of cyclopentanone.....</b>              | <b>S8</b>  |
| <b>7</b> | <b><sup>13</sup>C NMR of the reaction of 1 with thiols in presence of cyclopentanone.....</b> | <b>S9</b>  |
| <b>8</b> | <b>UV-Vis spectra for the reaction of HNO with acyloxy nitroso compounds.....</b>             | <b>S10</b> |

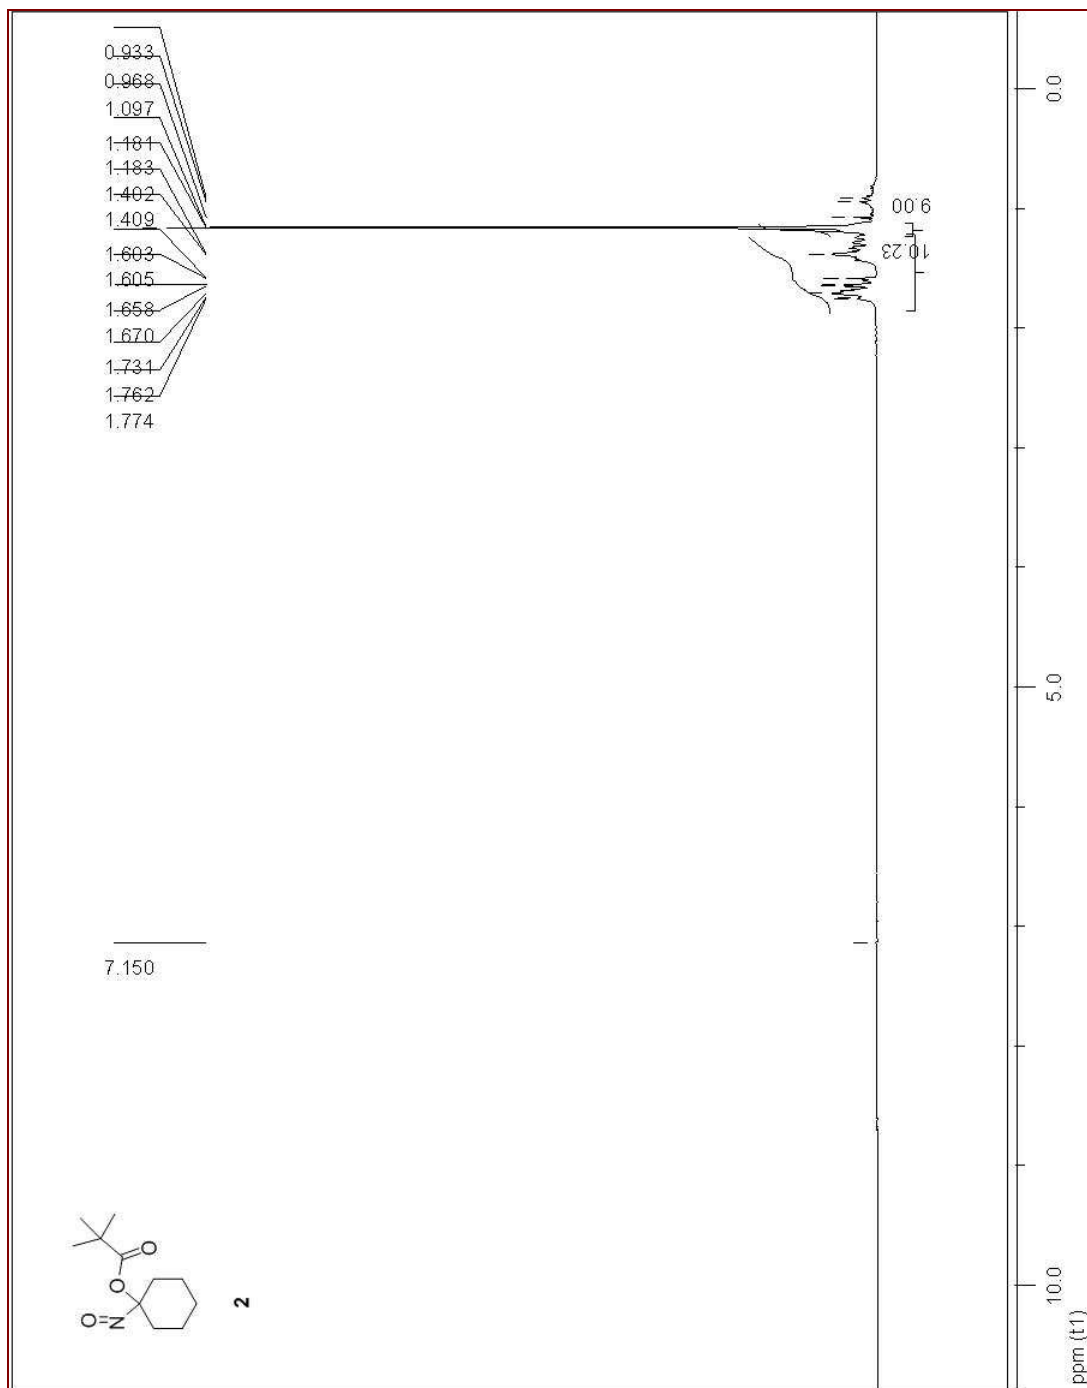

**Figure S1.** <sup>1</sup>H NMR spectrum for **2**.

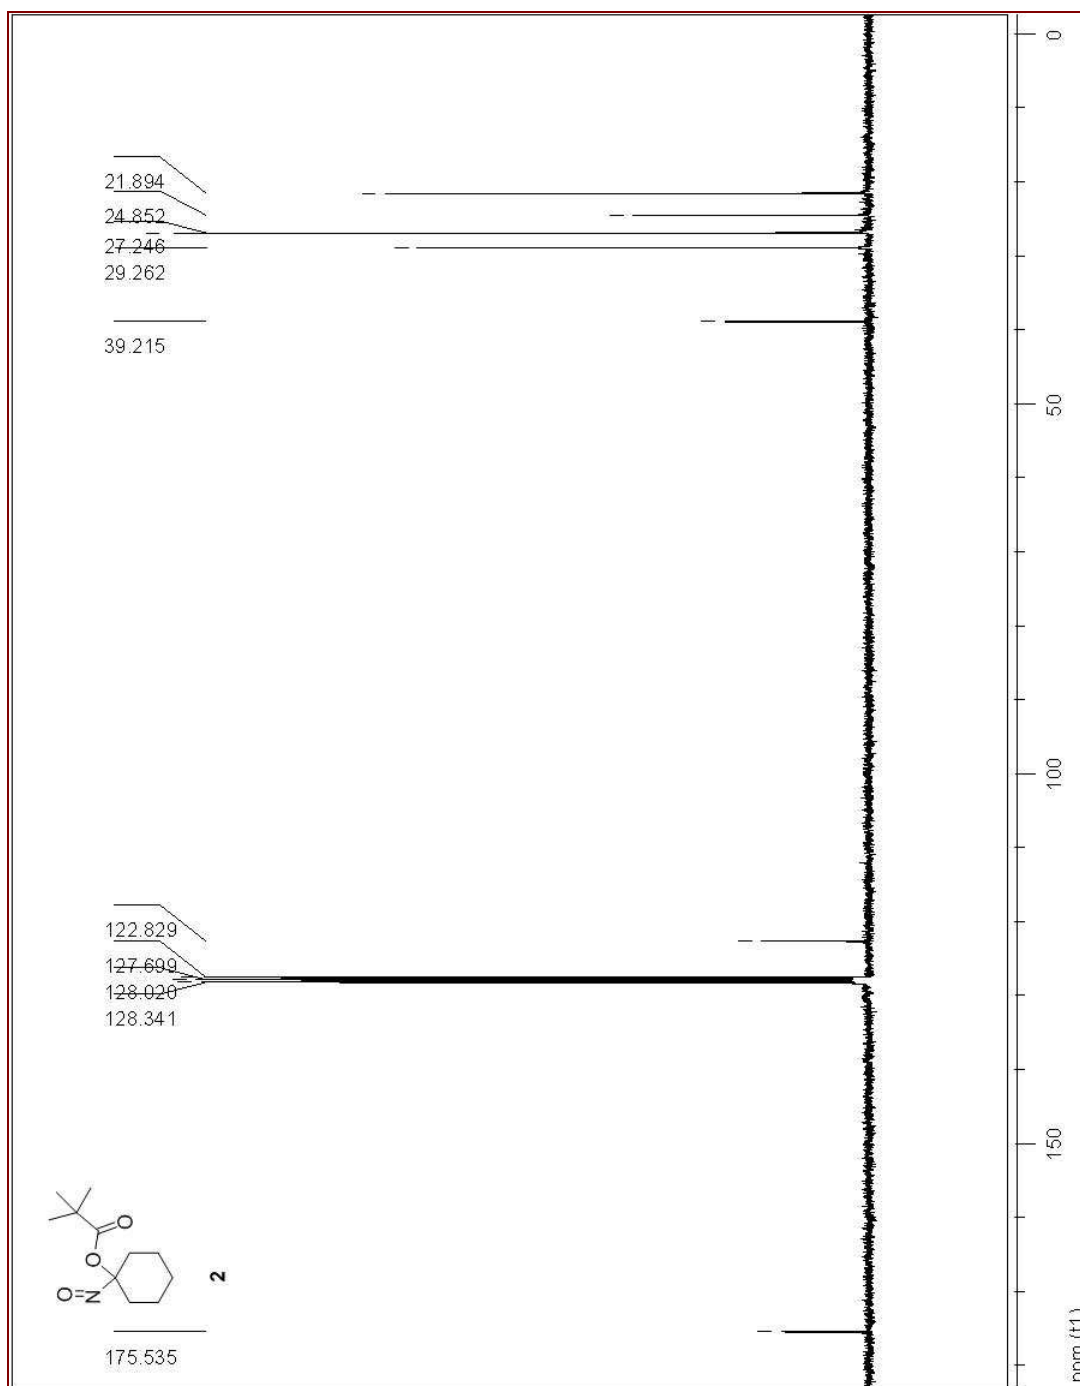

**Figure S2.**  $^{13}\text{C}$  NMR spectrum for **2**.

(A)

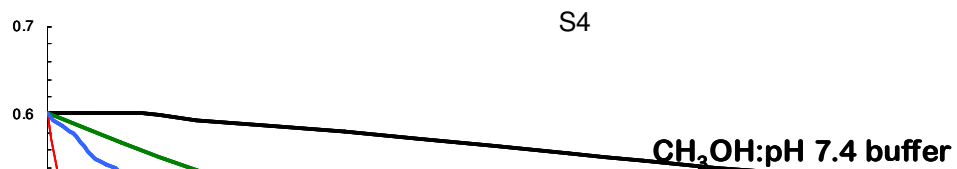

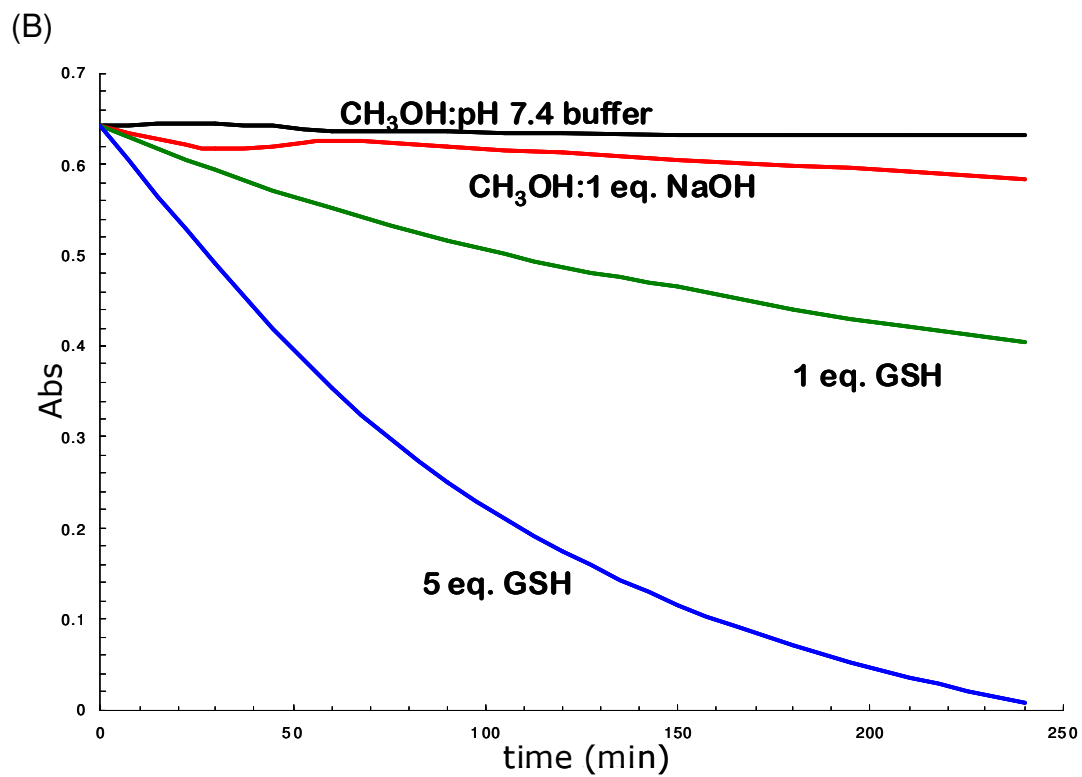

**Figure S3.** (A) UV-Vis decomposition of **1** (B) UV-Vis decomposition of **2**.

(A)

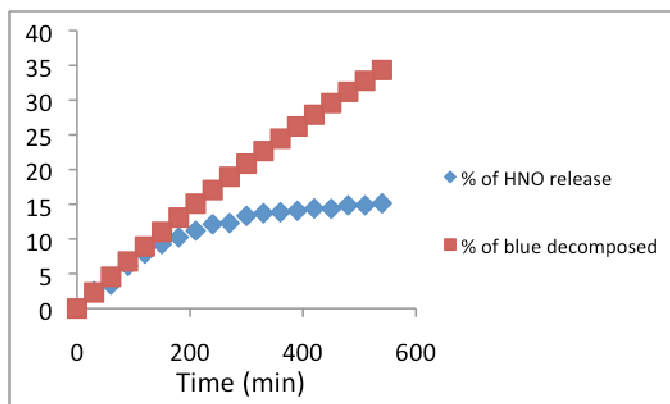

(B)

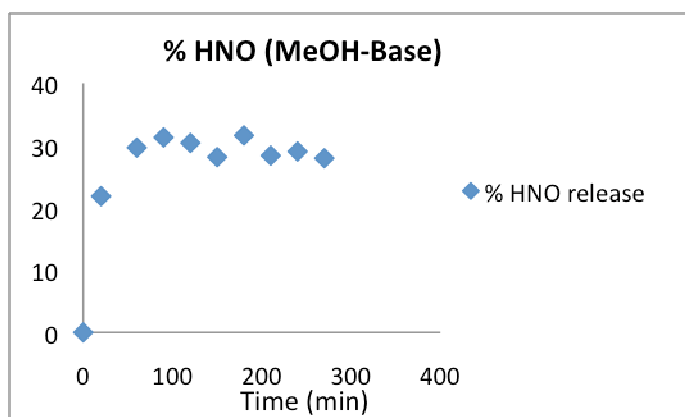

**Figure S4.** (A) Amount of HNO released and amount of **1** decomposed over time in 0.1 M Tris buffer, pH 7.6 (B) Amount of HNO released and amount of **1** decomposed over time in 0.1 M NaOH.

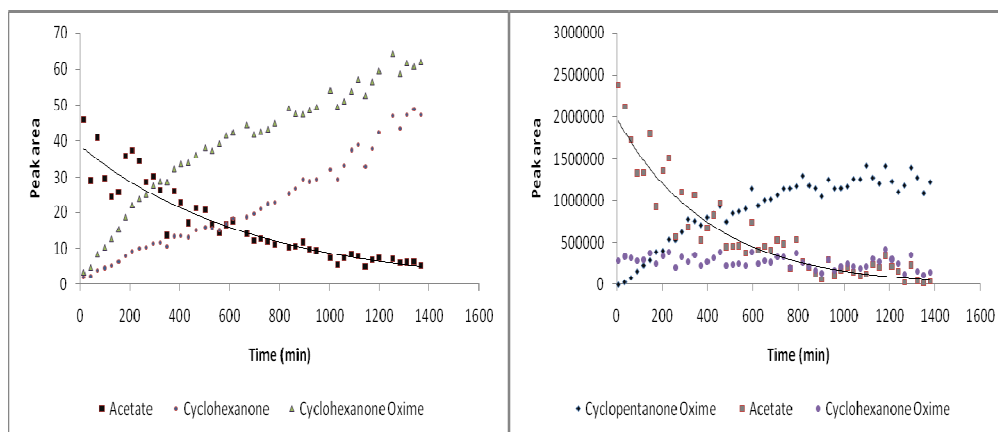

(A)

(B)

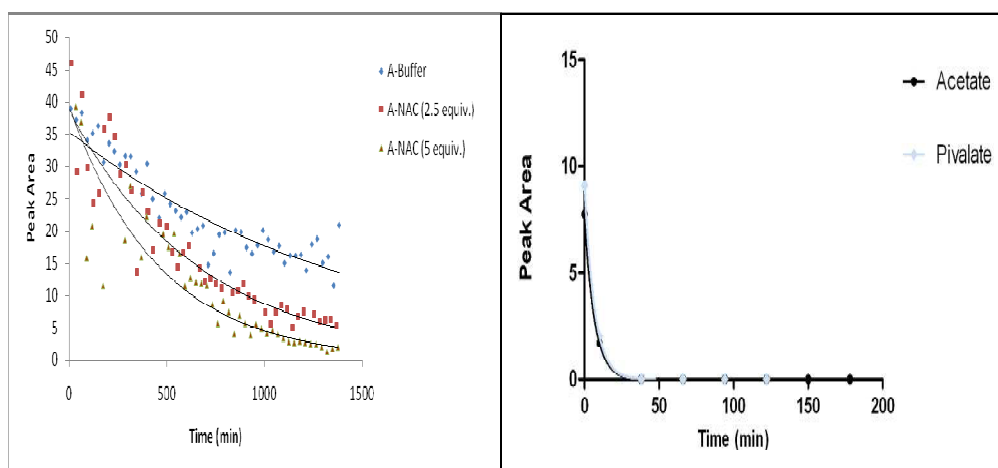

(C)

(D)

**Figure S5.** Peak areas of the GC-MS spectra of (A) Buffer hydrolysis of **1** with NAC (B) Buffer hydrolysis of **1** with NAC in presence of cyclopentanone (C) Buffer hydrolysis of **1** with different equivalents of NAC (D) Buffer hydrolysis of **1** and **2** with TP.

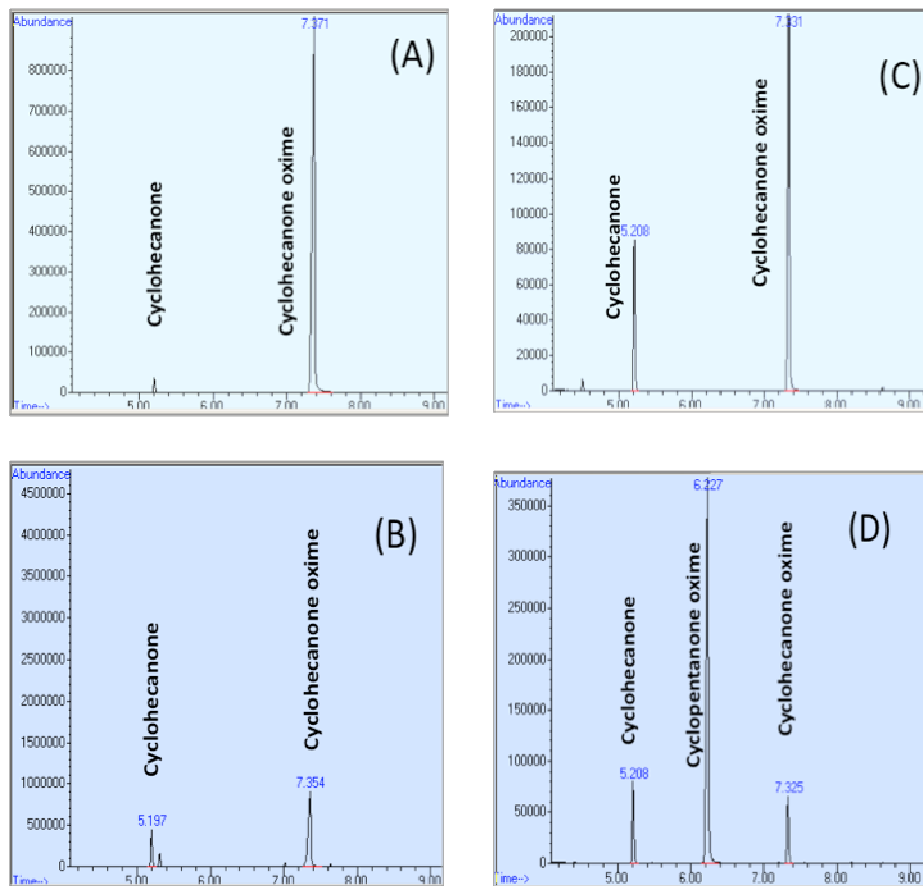

**Figure S6.** GC-MS spectra of (A) Basic GSH decomposition of **1** (B) Basic GSH decomposition of **1** in presence of cyclopentanone (C) Buffer GSH decomposition of **1** (D) Buffer GSH decomposition of **1** in presence of cyclopentanone.



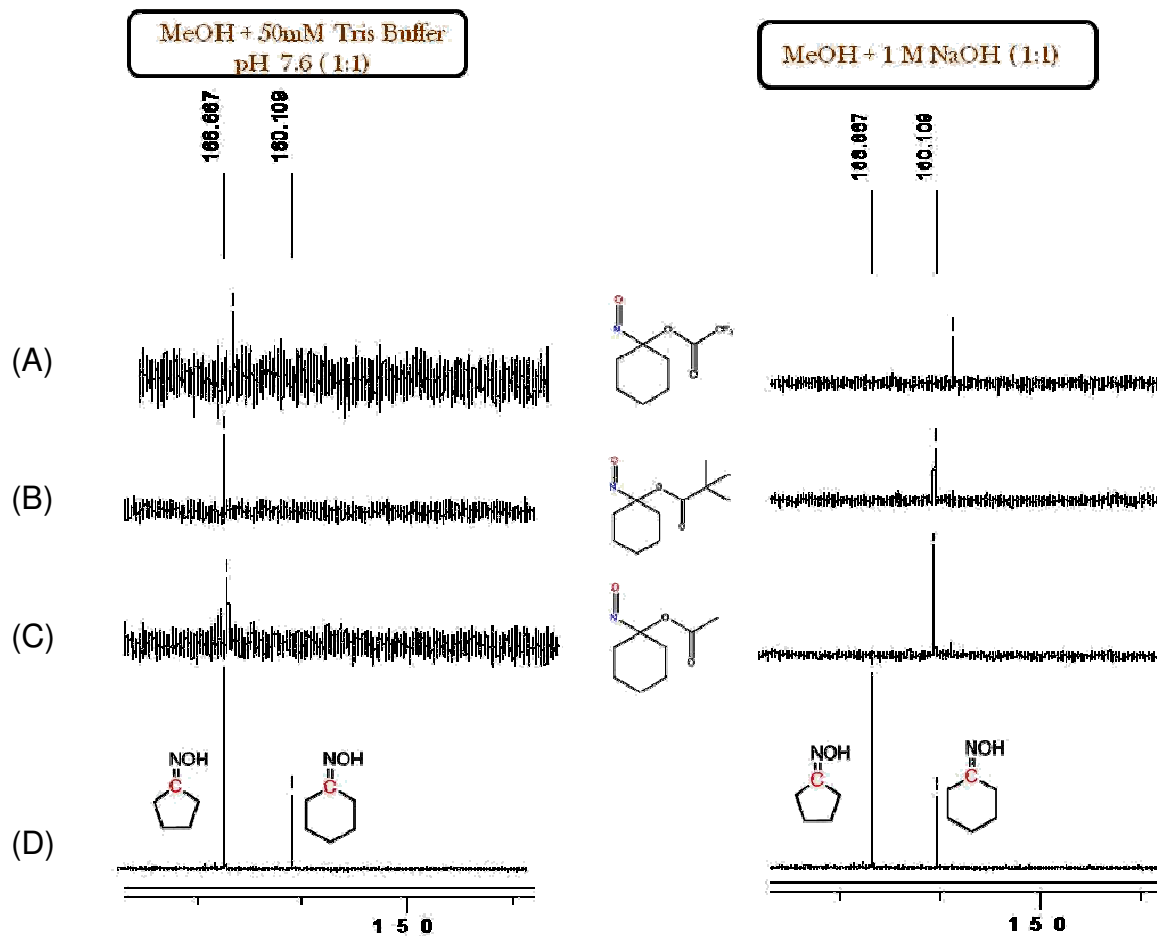

**Figure S7.**  $^{13}\text{C}$  NMR spectra of (A) Reaction of **3** with GSH in presence of cyclopentanone at different conditions (B) Reaction of **2** with GSH in presence of cyclopentanone at different conditions (C) Reaction of **1** with GSH in presence of cyclopentanone at different conditions (D) Standard cyclohexanone oxime and cyclopentanone oxime.

(A)

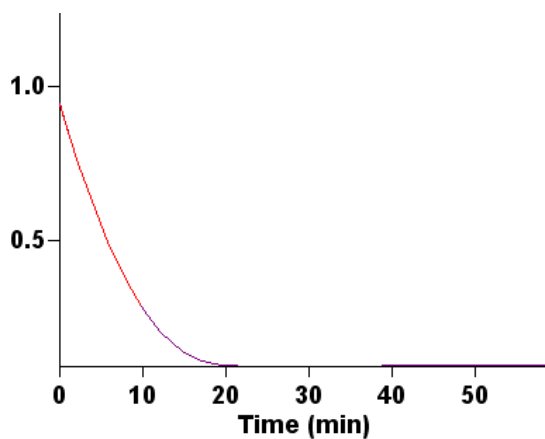

(B)

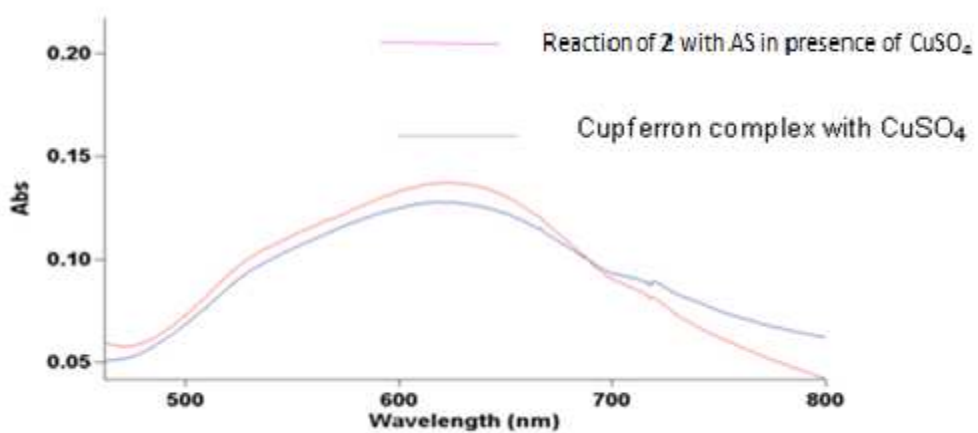

**Figure S8.** (A) UV-Vis decomposition of **2** upon the addition of Angeli's salt (B) UV-Vis spectrum of the products formed from the reaction of **2** with AS in presence of CuSO<sub>4</sub> compared to that of cupferron with CuSO<sub>4</sub>.
